# Supplementary material for: Silver nanoparticle-decorated titanium dioxide nanowire systems via bioinspired poly(l-DOPA) thin film as a surface-enhanced Raman spectroscopy (SERS) platform, and photocatalyst
Source: Royal Society of Chemistry journal article supplement (doi:10.1039/d1cp01322j), 2021-01-01
Supplement: d1cp01322j1.pdf [file d1cp01322j1.pdf]

### Supplementary Information

## Silver nanoparticle-decorated titanium dioxide nanowire systems via bioinspired poly(L-DOPA) thin film as surface-enhanced Raman spectroscopy (SERS) platform, and photocatalyst

Hayrunnisa Mazlumoglu<sup>a</sup> and Mehmet Yilmaz<sup>a,b,c\*</sup>

<sup>a</sup>Department of Chemical Engineering, Ataturk University, 25240 Erzurum, Turkey

<sup>b</sup>East Anatolia High Technology Application and Research Center (DAYTAM), Ataturk University, 25240 Erzurum, Turkey

<sup>c</sup>Department of Nanoscience and Nanoengineering, Ataturk University, 25240 Erzurum, Turkey

\*Correspondence: MY, [nano.yilmaz@gmail.com](mailto:nano.yilmaz@gmail.com)

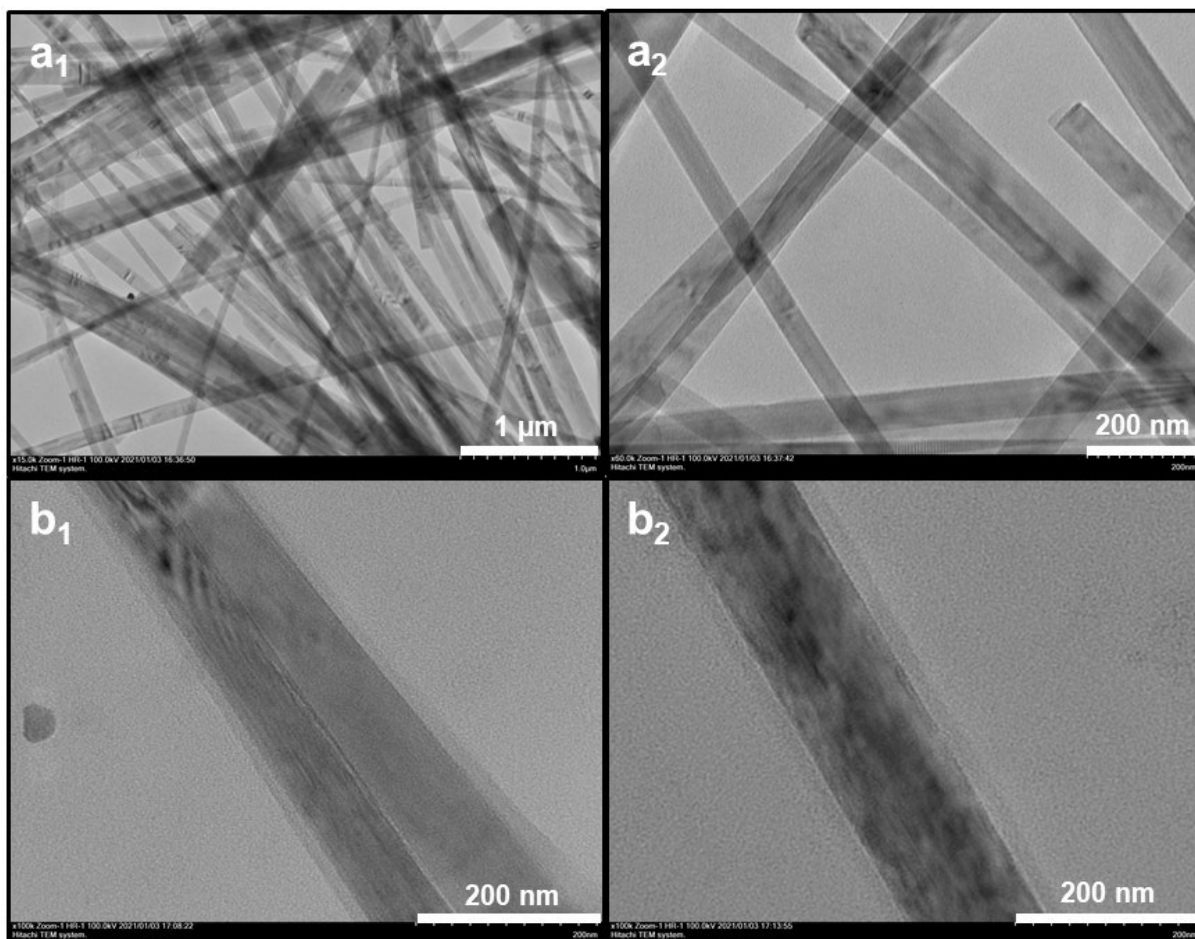

**Figure S1.** Representative TEM images of TiO<sub>2</sub> NWs (a) and TiO<sub>2</sub>@PLDOPA systems (b) at different magnifications.

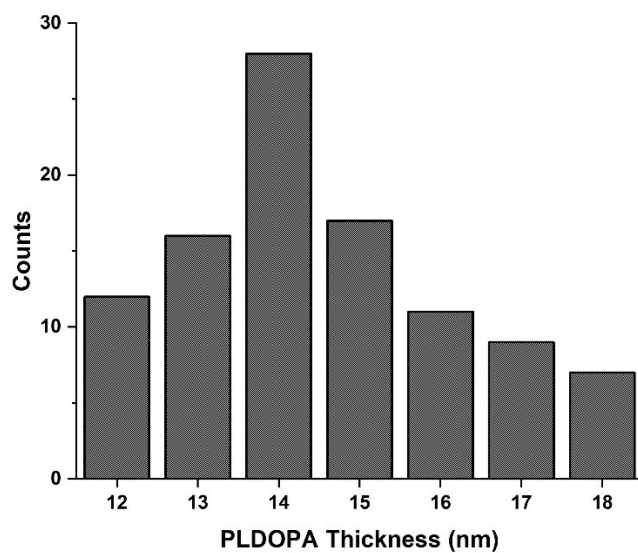

**Figure S2.** Histogram of PLDOPA thickness onto the TiO<sub>2</sub> NWs. At least 100 measurements were collected from the random sites of different TiO<sub>2</sub>@PLDOPA NPs.

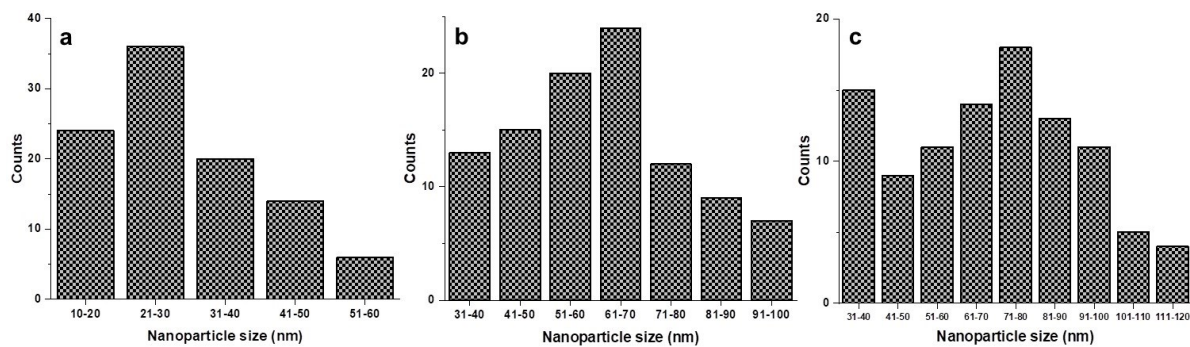

**Figure S3.** Histograms of silver nanostructures onto the TiO<sub>2</sub>@PLDOPA NPs for a different amount of silver. (a) TiO<sub>2</sub>@PLDOPA@Ag1, (b) TiO<sub>2</sub>@PLDOPA@Ag2 and (c) TiO<sub>2</sub>@PLDOPA@Ag3. At least 100 measurements were collected from the randomly selected silver nanostructures.

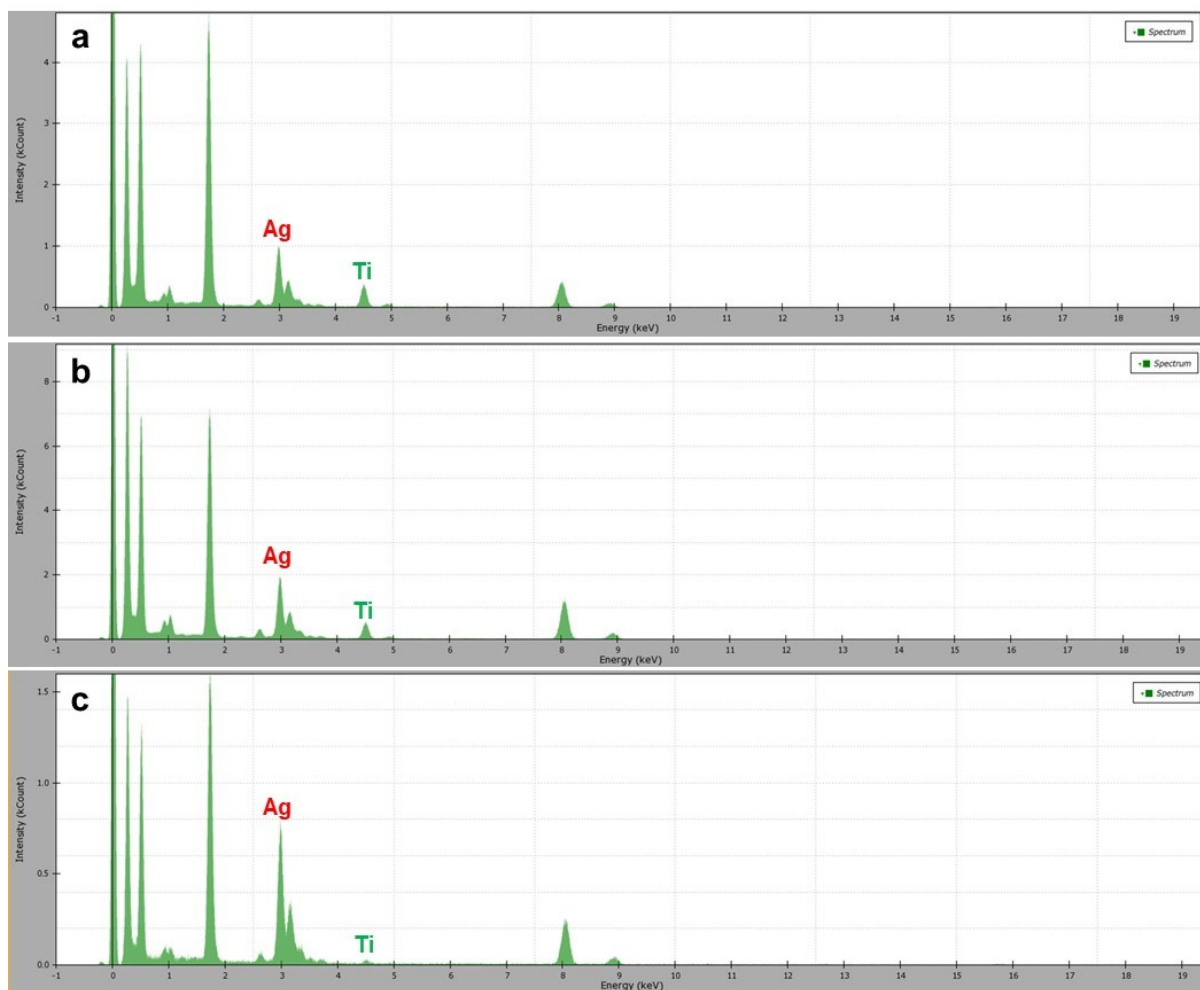

**Figure S4.** EDX spectra of  $\text{TiO}_2@PLDOPA@Ag$  NP systems for a different amount of silver. (a)  $\text{TiO}_2@PLDOPA@Ag_1$ , (b)  $\text{TiO}_2@PLDOPA@Ag_2$  and (c)  $\text{TiO}_2@PLDOPA@Ag_3$ .

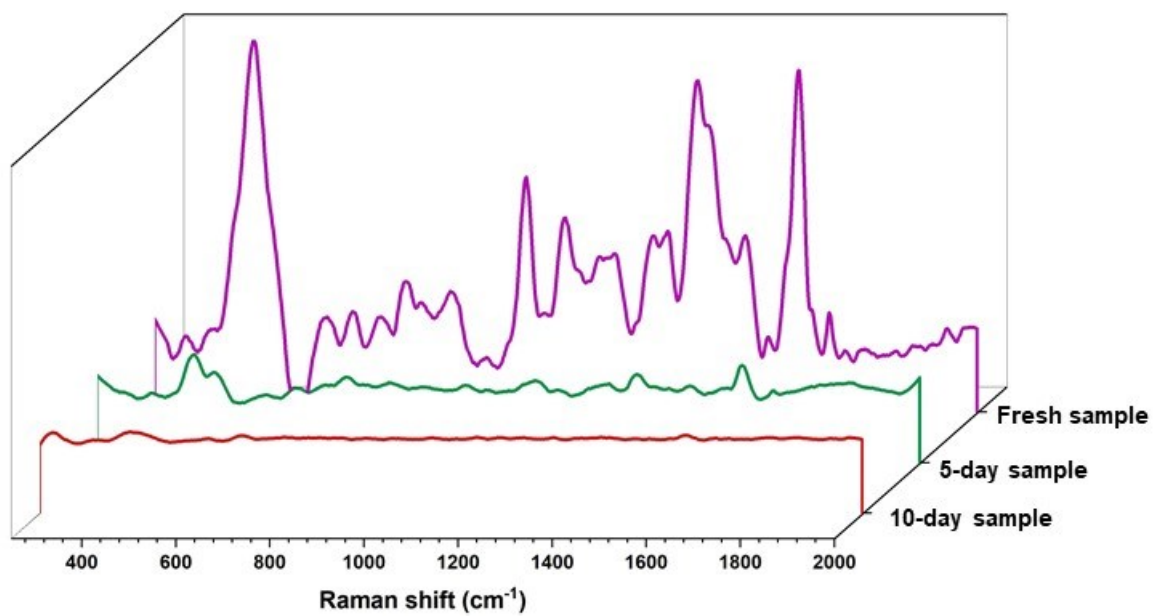

**Figure S5.** Catalytic degradation of MB over time in the presence of  $\text{TiO}_2@\text{PLDOPA}@\text{Ag}_2$  NP system at ambient condition.

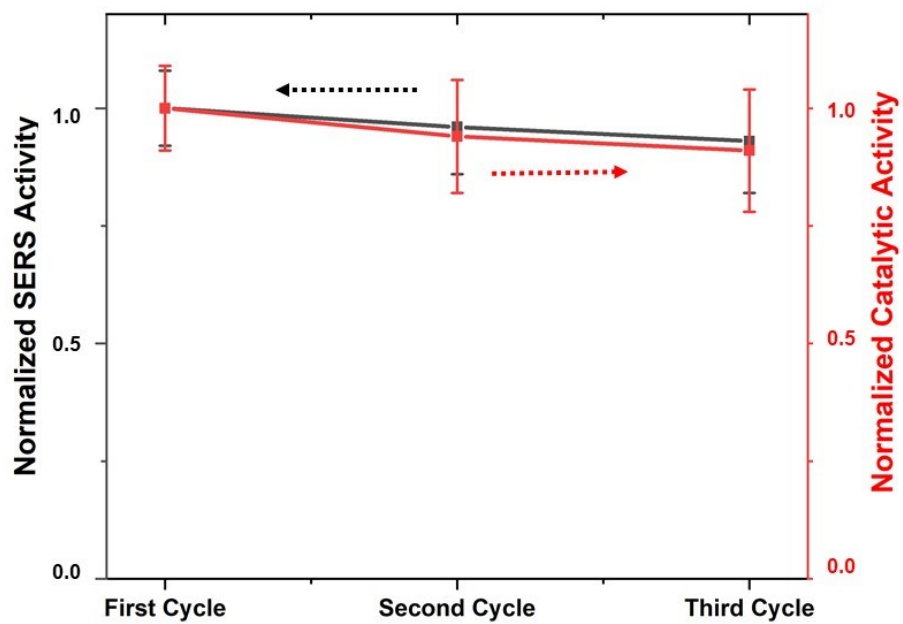

**Figure S6.** The reusability of  $\text{TiO}_2\text{@PLDOPA@Ag}_2$  NP system on SERS and catalytic activity over three cycles.

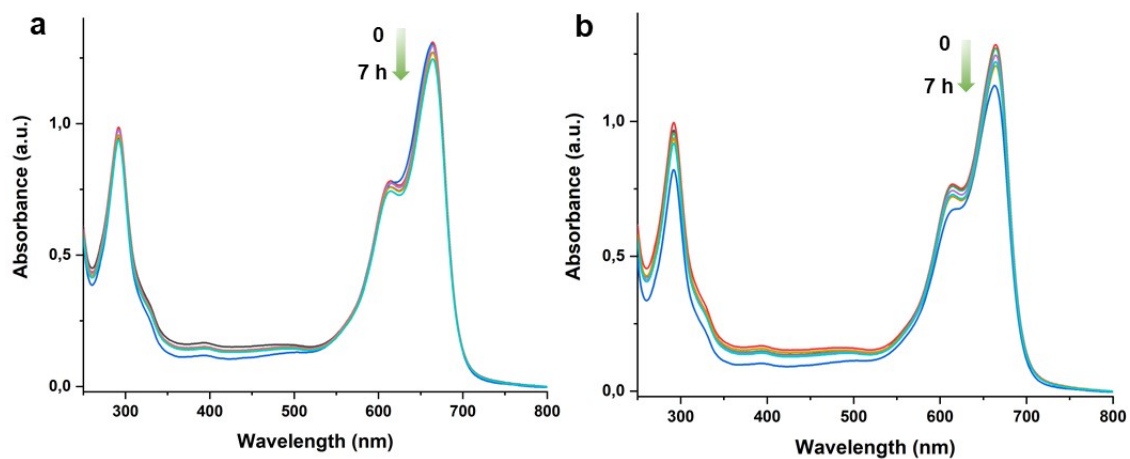

**Figure S7.** Time evolution of the UV-vis spectra indicating the conversion of MB in the presence of TiO<sub>2</sub> NWs (a) and, citrate-stabilized silver NPs.

Table S1. The comparison of AuNP or AgNP decorated TiO<sub>2</sub> nano/microparticles SERS active materials from literature.

| <i>Reference</i>          | <i>SERS Platform</i>                                    | <i>Prope Molecule</i> | <i>Enhancement Factor</i> |
|---------------------------|---------------------------------------------------------|-----------------------|---------------------------|
| Shan et al. <sup>1</sup>  | Hydrogenated TiO <sub>2</sub> NWs@Ag                    | Rhodamine 6G          | ~10 <sup>5</sup>          |
| Ling et al. <sup>2</sup>  | Ag-embedded TiO <sub>2</sub> nanotubes array            | Rhodamine 6G          | NA                        |
| Kumar et al. <sup>3</sup> | AgNP decorated TiO <sub>2</sub> nanorod array           | Rhodamine 6G          | ~10 <sup>5</sup>          |
| Xie et al. <sup>4</sup>   | AuNP decorated TiO <sub>2</sub> nanorod arrays          | Rhodamine 6G          | ~10 <sup>4</sup>          |
| Dinc et al. <sup>5</sup>  | Au nanoisland decorated TiO <sub>2</sub> nanorod arrays | Methylene blue        | ~10 <sup>2</sup>          |
| This study                | TiO <sub>2</sub> @PLDOPA@Ag NP systems                  | Methylene blue        | 5.1 × 10 <sup>5</sup>     |



Table S2. The comparison of AuNP or AgNP decorated TiO<sub>2</sub> nano/microparticles catalytic systems from literature.

| <i>Reference</i>            | <i>Catalytic Platform</i>                     | <i>Catalytic Conversion</i>   | <i>Rate Constant (h<sup>-1</sup>)</i> |
|-----------------------------|-----------------------------------------------|-------------------------------|---------------------------------------|
| Ali et al. <sup>6</sup>     | Ag-doped TiO <sub>2</sub> nanoparticles       | Degradation of methylene blue | NA                                    |
| Kumar et al. <sup>3</sup>   | AgNP decorated TiO <sub>2</sub> nanorod array | Degradation of Rhodamine 6G   | 2.58                                  |
| Liang et al. <sup>7</sup>   | Ag/TiO <sub>2</sub> nanoparticles             | Degradation of Rhodamine B    | NA                                    |
| Ma et al. <sup>8</sup>      | Ag/TiO <sub>2</sub> hollow nanospheres        | Degradation of methylene blue | 0.6-2.1                               |
| Mrowetz et al. <sup>9</sup> | Au/TiO <sub>2</sub> systems                   | Degradation of acid red 1     | 0.13-0.29                             |
| This study                  | TiO <sub>2</sub> @PLDOPA@Ag NP systems        | Degradation of methylene blue | 0.083-0.644                           |

## References

1. Y. Shan, Y. Yang, Y. Cao, H. Yin, N. V. Long and Z. Huang, *RSC Advances*, 2015, **5**, 34737-34743.
2. Y. Ling, Y. Zhuo, L. Huang and D. Mao, *Applied Surface Science*, 2016, **388**, 169-173.
3. S. Kumar, D. K. Lodhi and J. Singh, *RSC advances*, 2016, **6**, 45120-45126.
4. Z. Xie, F. Zhao, S. Zou, F. Zhu, Z. Zhang and W. Wang, *Journal of Alloys and Compounds*, 2021, **861**, 157999.
5. D. O. Dinc, M. Yilmaz, S. Sebnem Cetin, M. Turk and E. Piskin, *Surface Innovations*, 2019, **7**, 249-259.
6. T. Ali, A. Ahmed, U. Alam, I. Uddin, P. Tripathi and M. Muneer, *Materials Chemistry and Physics*, 2018, **212**, 325-335.
7. H. Liang, Z. Jia, H. Zhang, X. Wang and J. Wang, *Applied Surface Science*, 2017, **422**, 1-10.
8. H. Ma, W. Zheng, X. Yan, S. Li, K. Zhang, G. Liu and L. Jiang, *Colloids and Surfaces A: Physicochemical and Engineering Aspects*, 2020, **586**, 124283.
9. M. Mrowetz, A. Villa, L. Prati and E. Selli, *Gold Bulletin*, 2007, **40**, 154-160.
